# Supplementary material for: The six-transmembrane protein Stamp2 ameliorates pulmonary vascular remodeling and pulmonary hypertension in mice
Source: PubMed Central journal article supplement (PMC7666299; doi:10.1007/s00395-020-00826-8), 2020-11-13

a)

Stamp2 staining

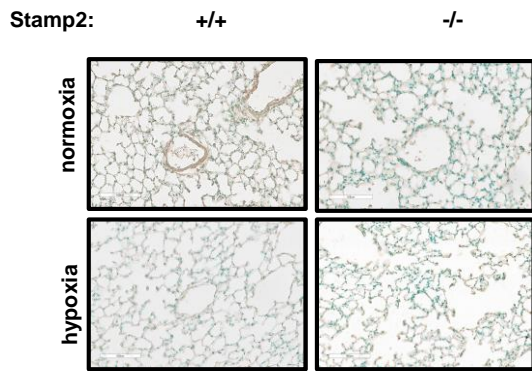

b)

Stamp2 staining

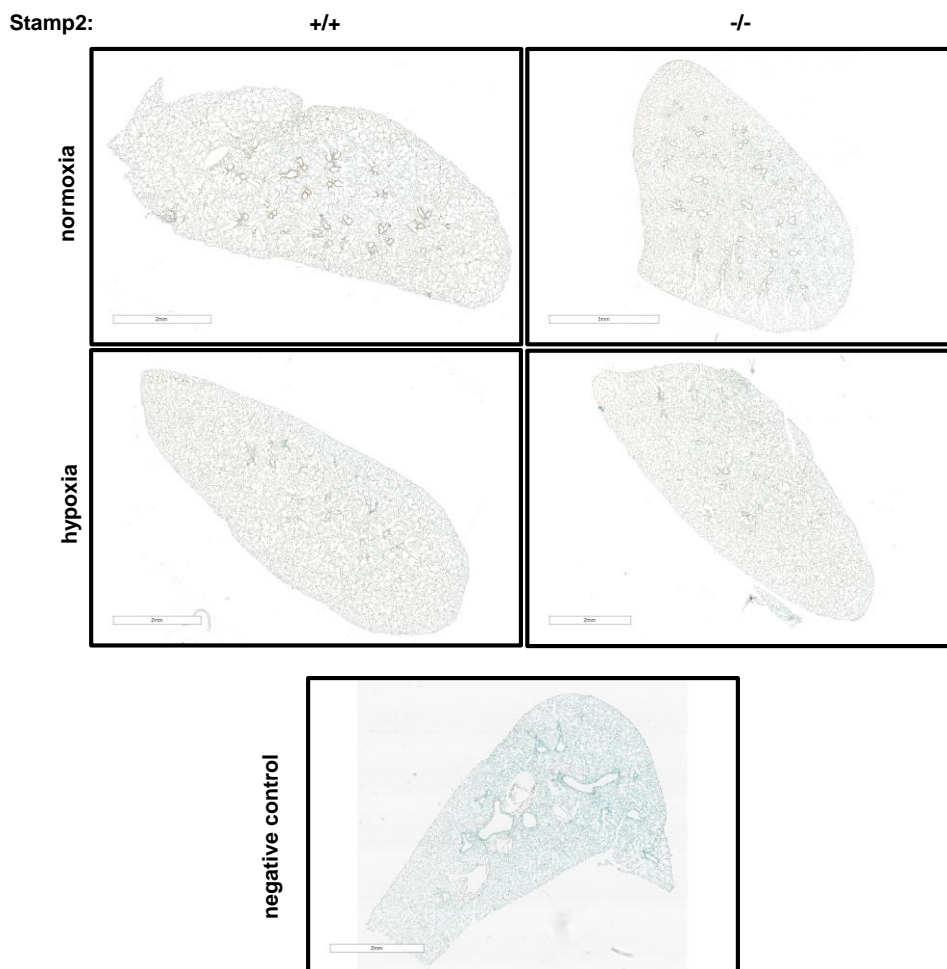

**Stamp2 downregulation in hMVEC**

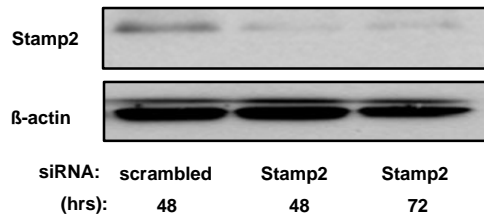

MVEC IL-6 expression

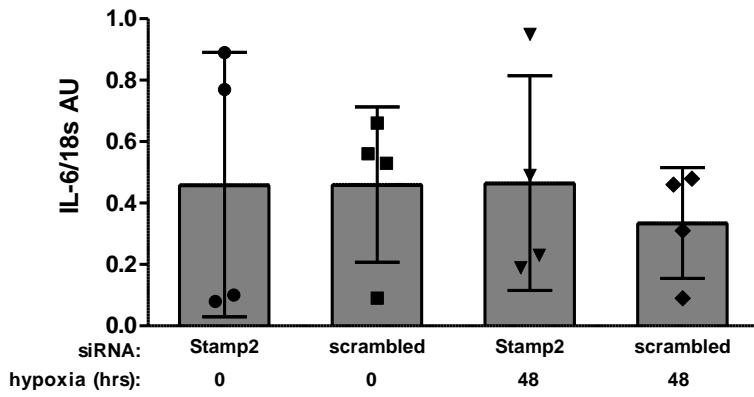

pp65 immunofluorescence

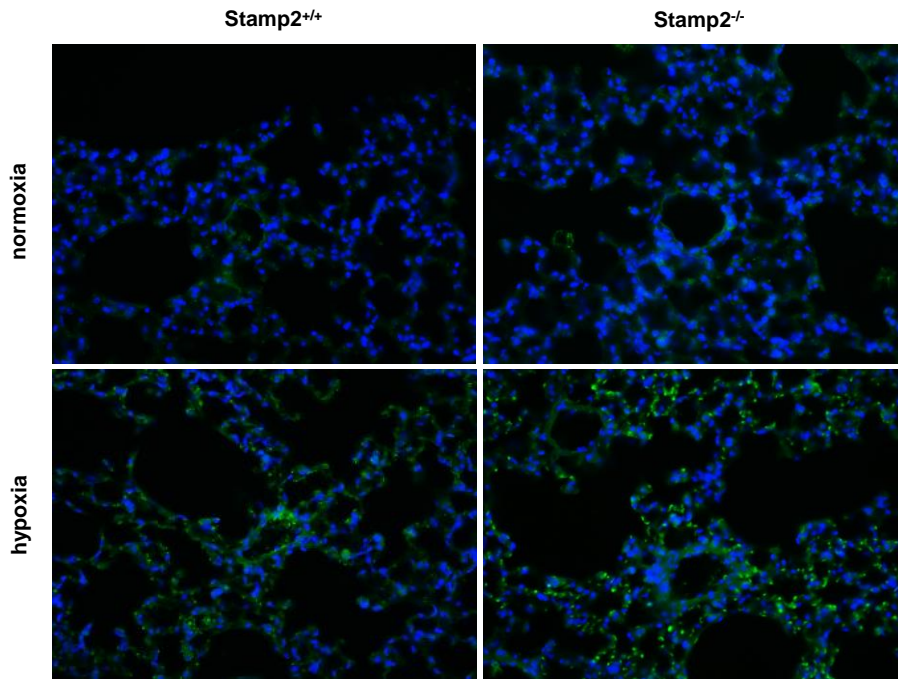

### Proliferation

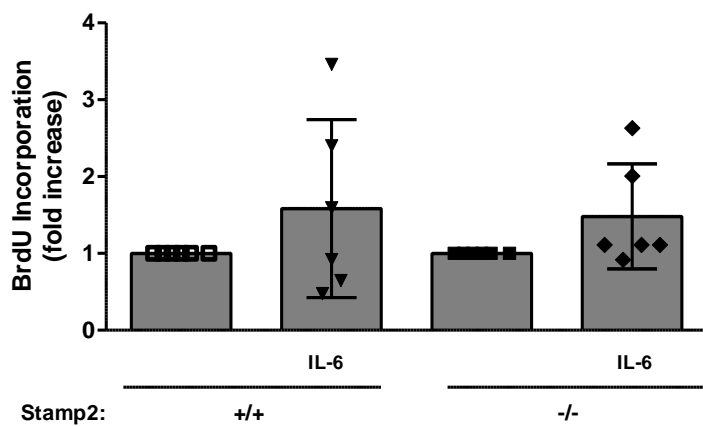

Supplement: 395_2020_826_MOESM1_ESM.pdf [file 395_2020_826_MOESM1_ESM.pdf]
